# Supplementary material for: Conditional deletion of Wntless in granulosa cells causes impaired corpora lutea formation and subfertility
Source: publisher site journal article supplement (doi:10.18632/aging.202222), 2020-12-03
Supplement: Supplementary file [file aging-v13i1-202222-supplementary-material-SD1.pdf]

SUPPLEMENTARY FIGURES

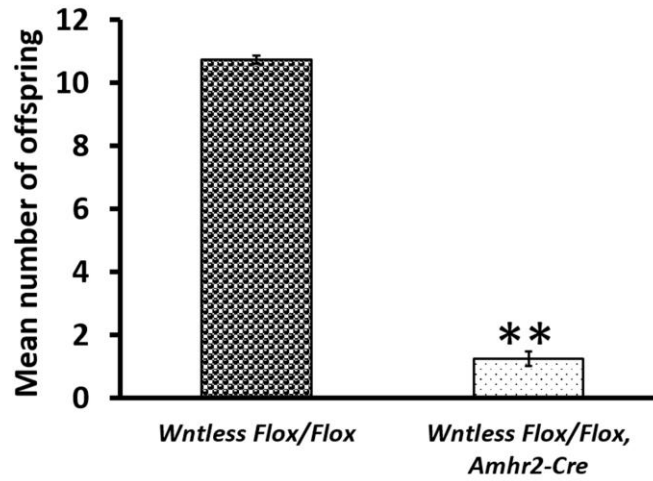

Supplementary Figure 1. Average litter size in the *Wntless* *Flox/Flox* and *Wntless* *Flox/Flox*, *Amhr2-Cre* mice. \*\**P*<0.01.

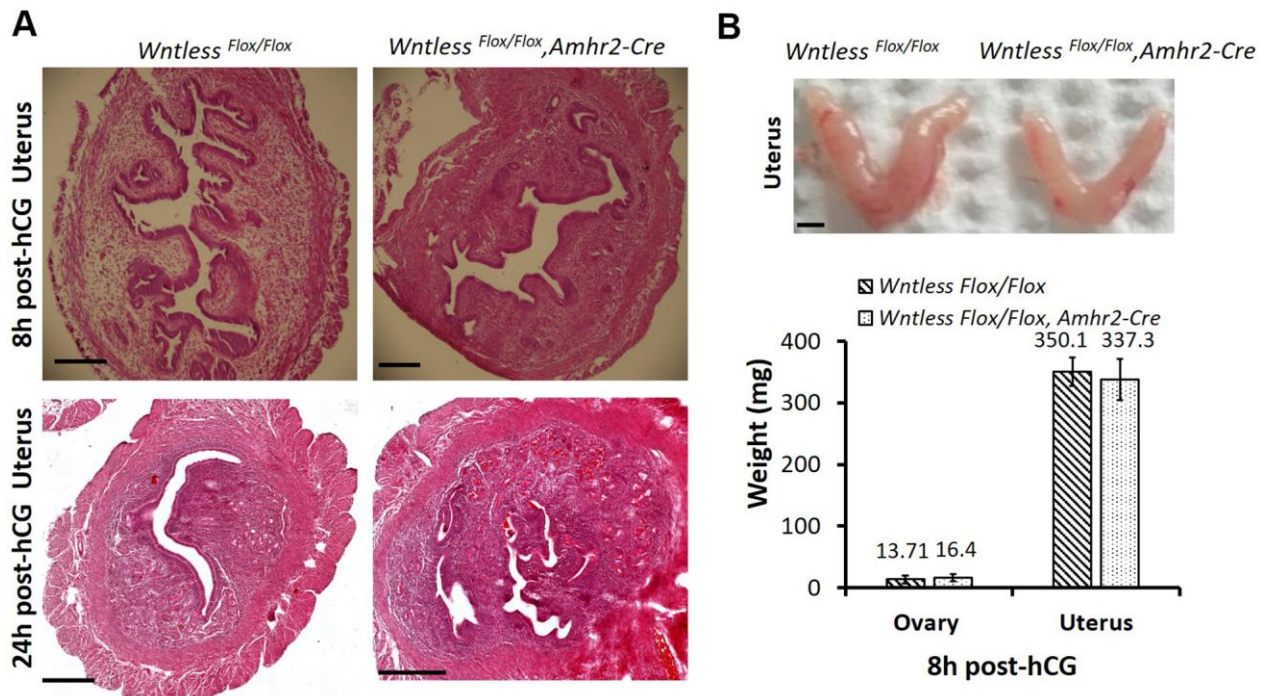

Supplementary Figure 2. The depletion of *Wntless* in mouse granulosa cells do not influence their uterine morphology and weight, and their ovarian appearance and weight. (A) HE staining of uterine morphology at 8 and 24 h post-hCG treatment. (B) Ovarian appearance (top) and weight (bottom) at 8 h post-hCG treatment.
